# Supplementary material
Source: PubMed Central journal article supplement (PMC7316389)
Supplement: NIHMS1591143-supplement-Supplement_7.pdf [file NIHMS1591143-supplement-Supplement_7.pdf]

### Molecular and Cellular Functions

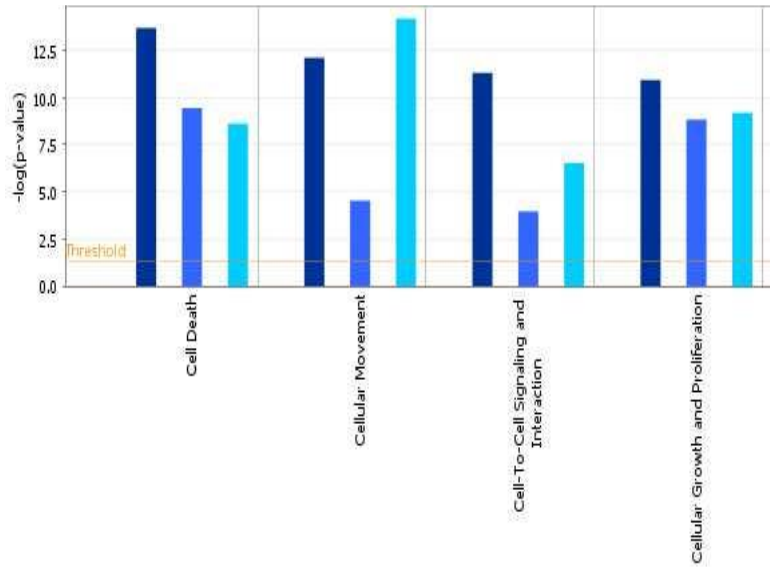

### Toxicity Lists

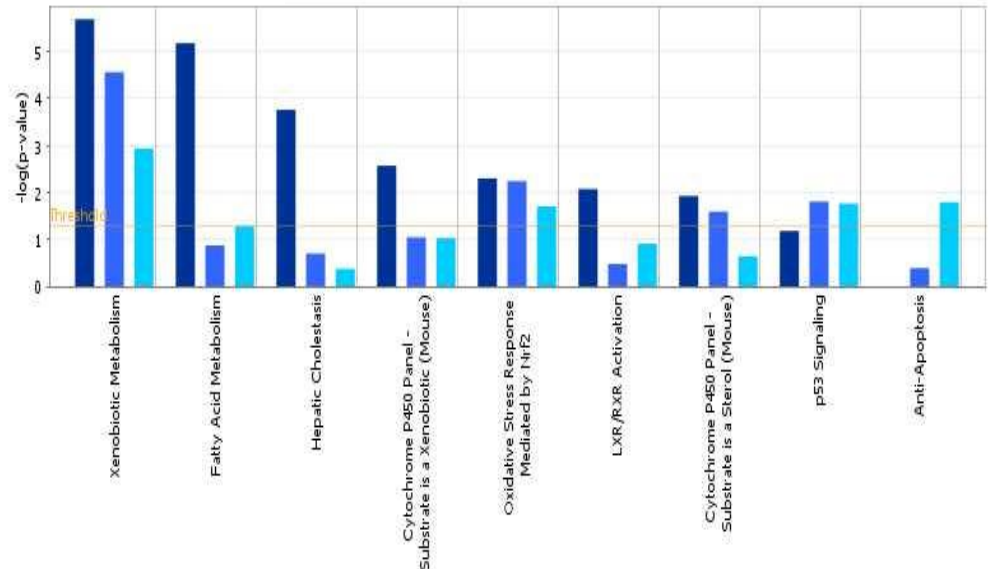

### Canonical Pathways

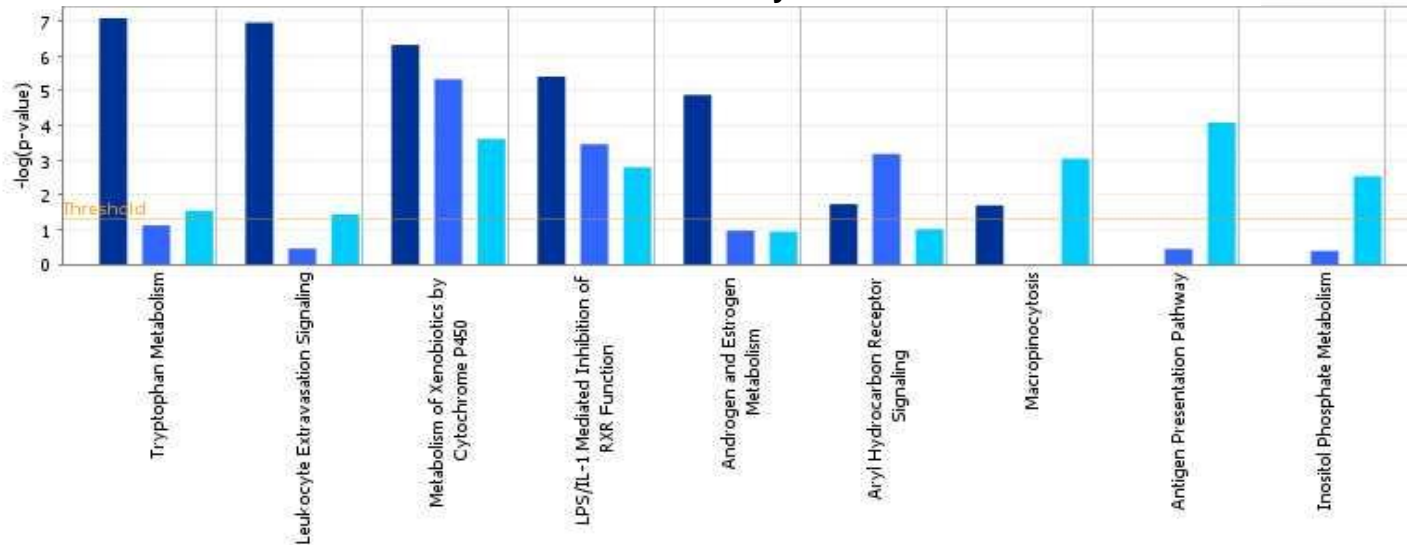

© 2000-2009 Ingenuity Systems, Inc. All rights reserved.

■ GD19 ■ PD32 ■ PD67
